# Supplementary material for: Controlled phase and crystallinity of FeNCN/NC dominating sodium storage performance
Source: Royal Society of Chemistry journal article supplement (doi:10.1039/d2dt00924b), 2022-01-01
Supplement: d2dt00924b1.pdf [file d2dt00924b1.pdf]

## *Supporting Information*

### **Controlled phase and crystallinity of FeNCN/NC dominating sodium storage performance**

Hui Qi<sup>1\*</sup>, Yan Hou<sup>1</sup>, Wenjing Wang<sup>2\*</sup>, Lin Tang<sup>1</sup>, Chuanyun Zhang<sup>1</sup>, Wen Deng<sup>1</sup>, Yayi Cheng<sup>3</sup>,  
Jingjing Zhang<sup>1</sup>

<sup>1</sup> School of Mechatronic Engineering, Xi'an Technological University, Shaanxi, China

<sup>2</sup> Faculty of Materials Metallurgy and Chemistry, Jiangxi University of Science and Technology

<sup>3</sup> School of Materials Engineering, Xi'an Aeronautical University, Shannxi, China

Corresponding author: qihui@xatu.edu.cn; wangwenjinggb@163.com

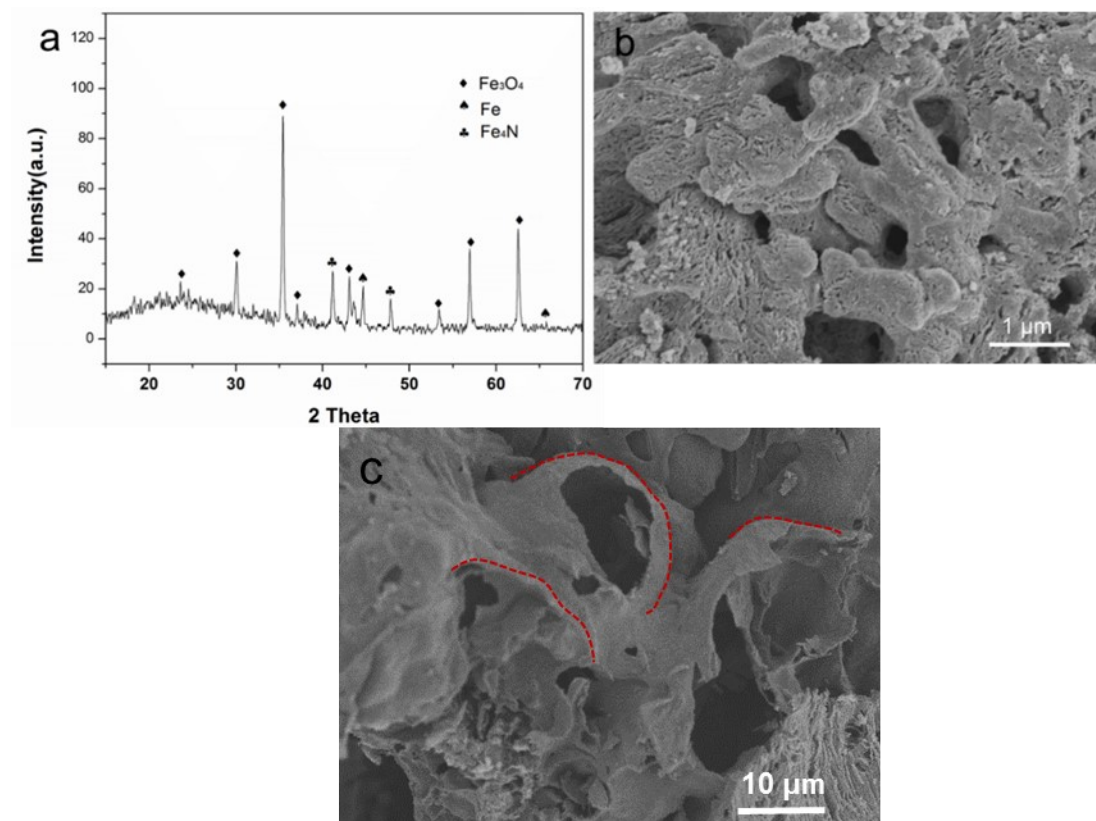

Fig.S1 (a) XRD patterns and (b) FESEM images of the product obtained after the reaction of urea and ferriamine oxalate in separate crucibles;(c) FESEM images of S-0

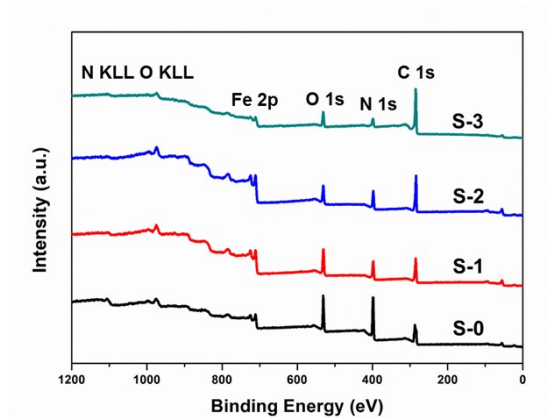

Fig.S2 XPS survey of prepared four samples at different growth stages

Table S1 Element content of the prepared four samples

| Sample    | S-0  | S-1  | S-2  | S-3  |
|-----------|------|------|------|------|
| <b>C</b>  | 37.1 | 53.5 | 58.0 | 78.1 |
| <b>N</b>  | 34.2 | 22.6 | 21.9 | 11.2 |
| <b>Fe</b> | 3.5  | 8.7  | 10.5 | 2.9  |
| <b>O</b>  | 25.2 | 15.2 | 9.6  | 7.8  |

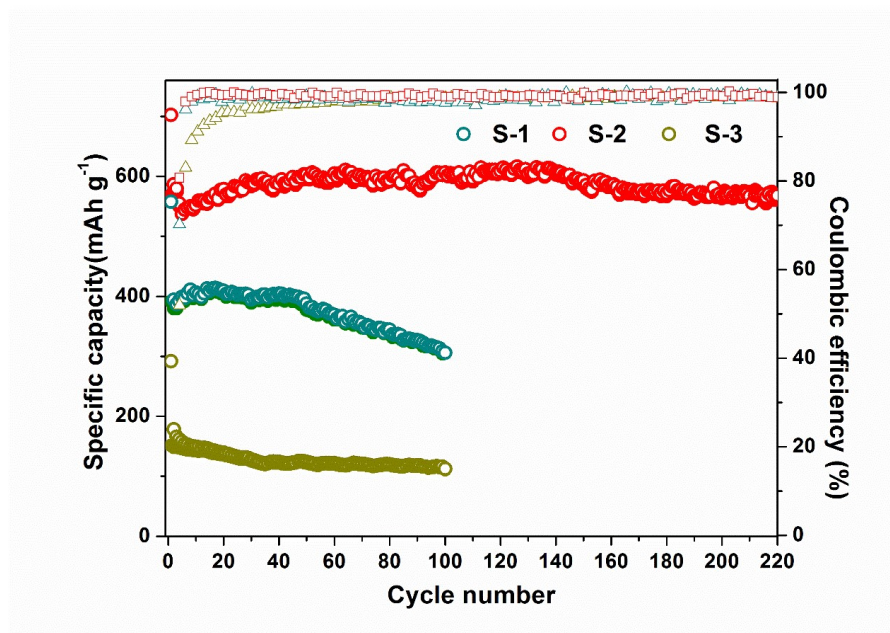

Fig.S3 Cycling performance of three samples at 0.1 A g<sup>-1</sup>
